# Supplementary figures and images for: Putting pressure on elusive polymorphs and solvates
Source: Royal Society of Chemistry journal article supplement (doi:10.1039/b814471k), 2008-11-28

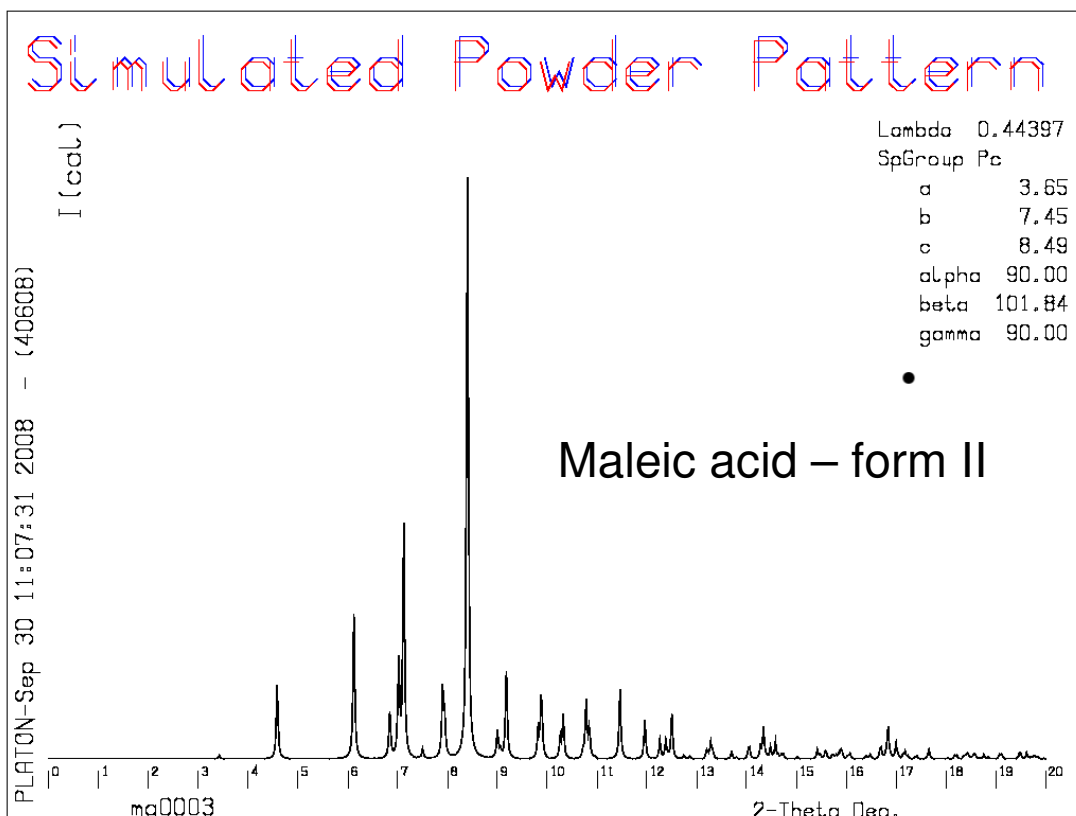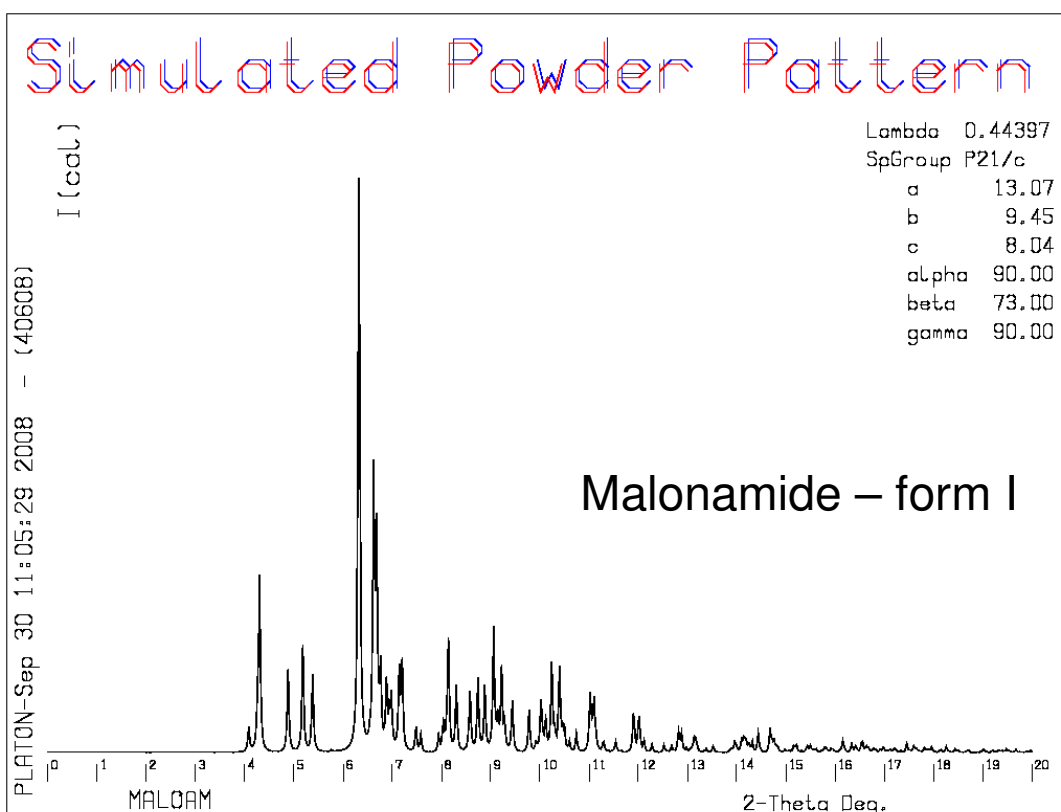

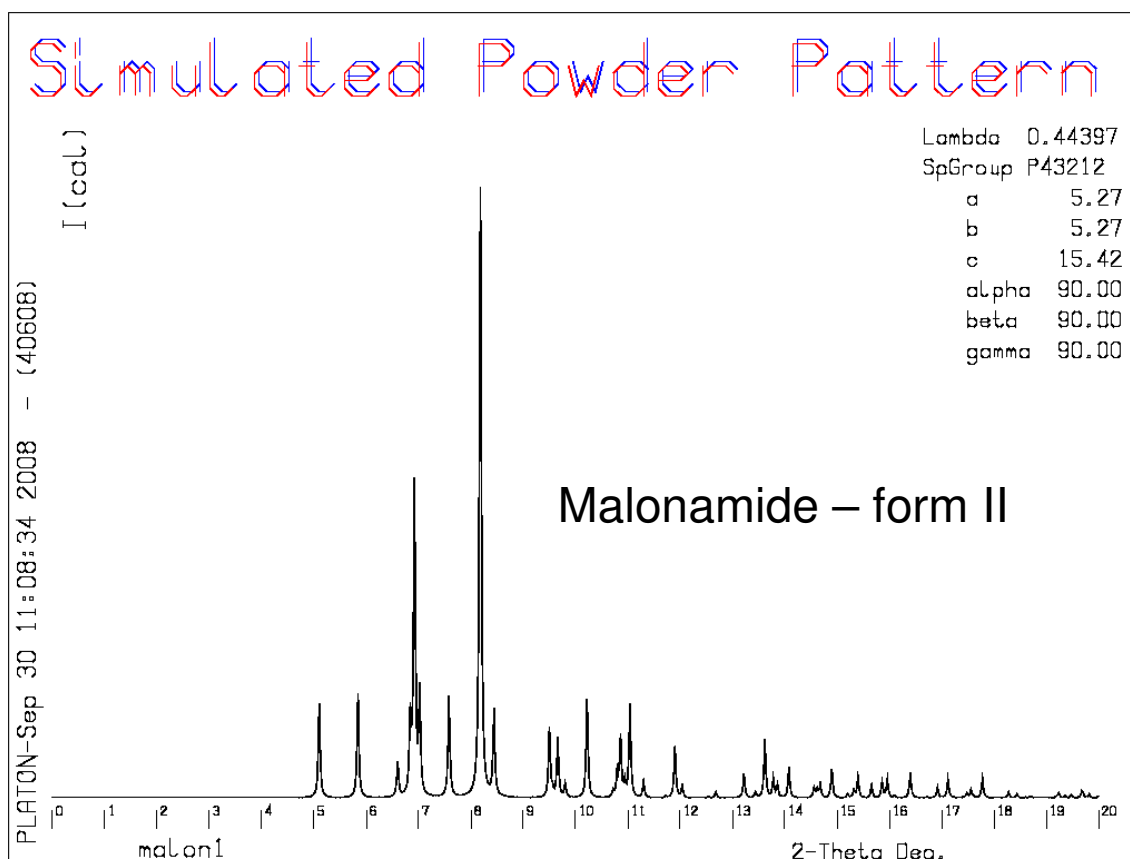

Supplement: b814471k.pdf [file b814471k.pdf]
